# Supplementary material
Source: PubMed Central journal article supplement (PMC6819246)
Supplement: NIHMS1536782-supplement-1.pdf [file NIHMS1536782-supplement-1.pdf]

## **SUPPLEMENTARY MATERIALS**

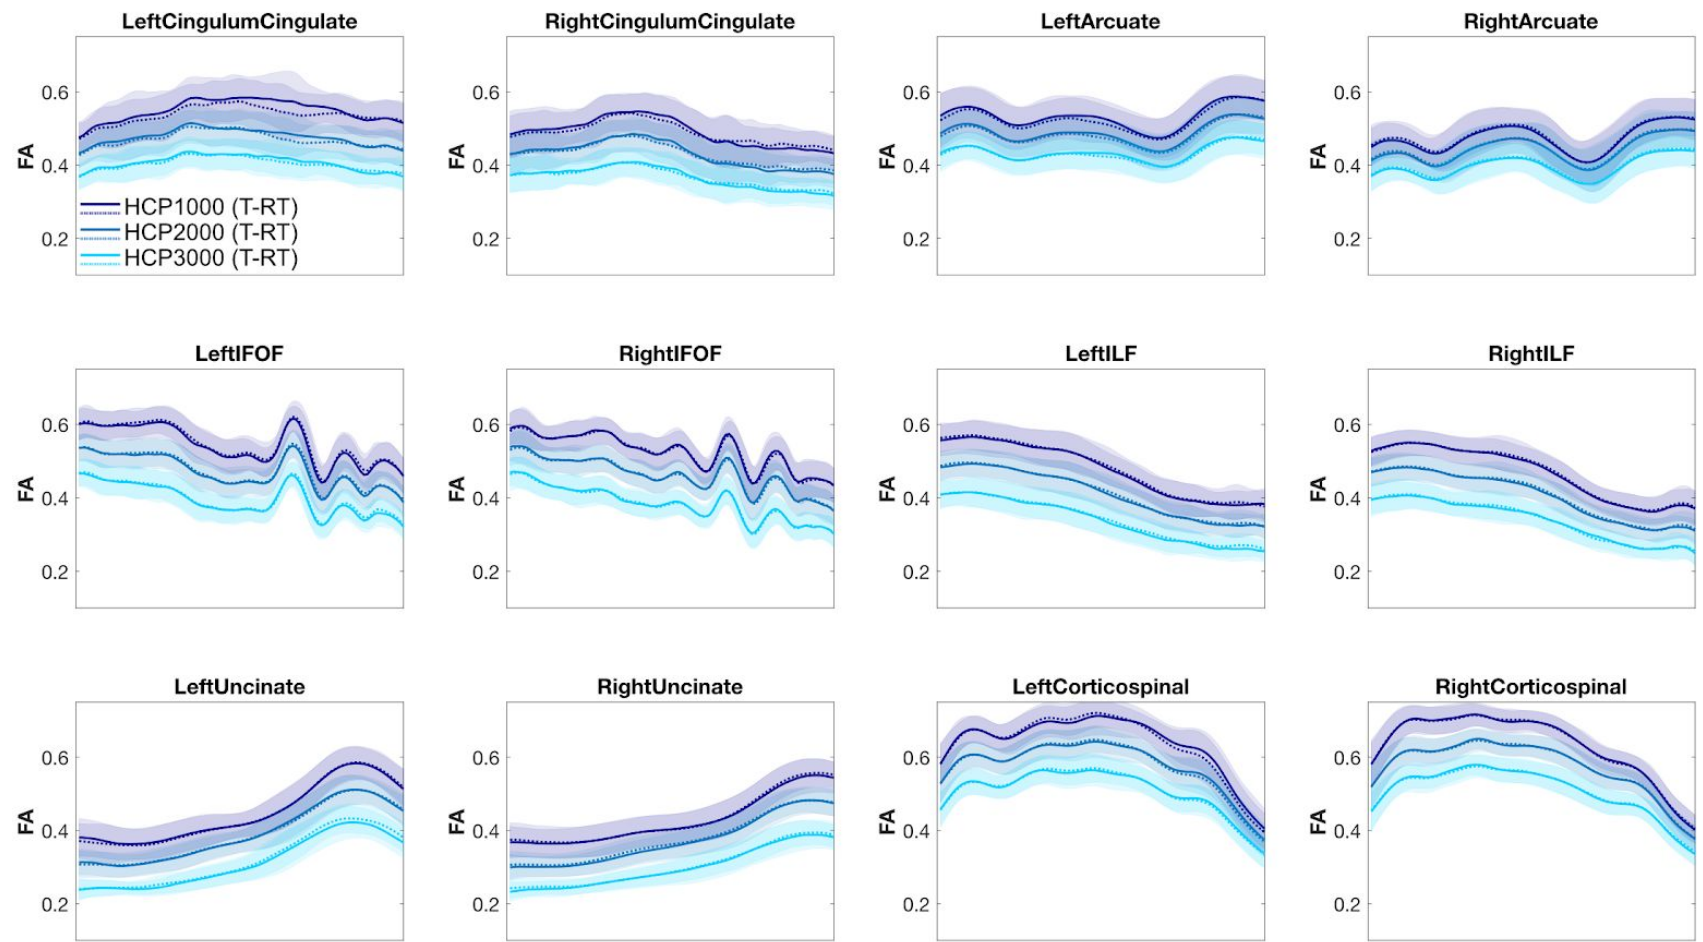

**Figure S1a.** Average FA profiles, HCP TEST-RETEST experiments, for six homologous white matter tracts.

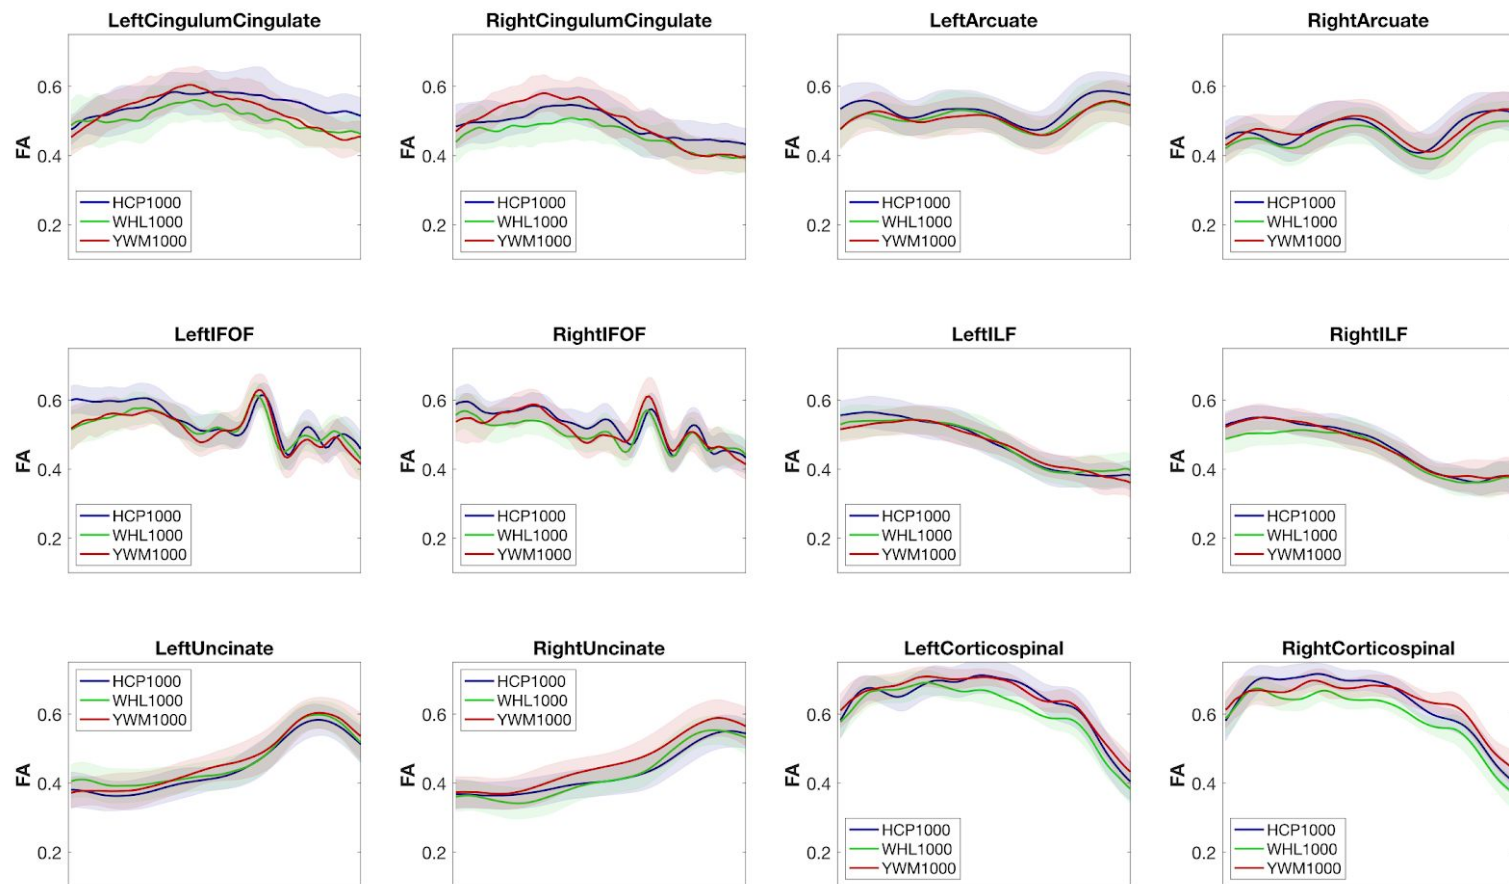

*Figure S1b. Average FA profiles,  $b=1000$  experiments, for six homologous white matter tracts.*

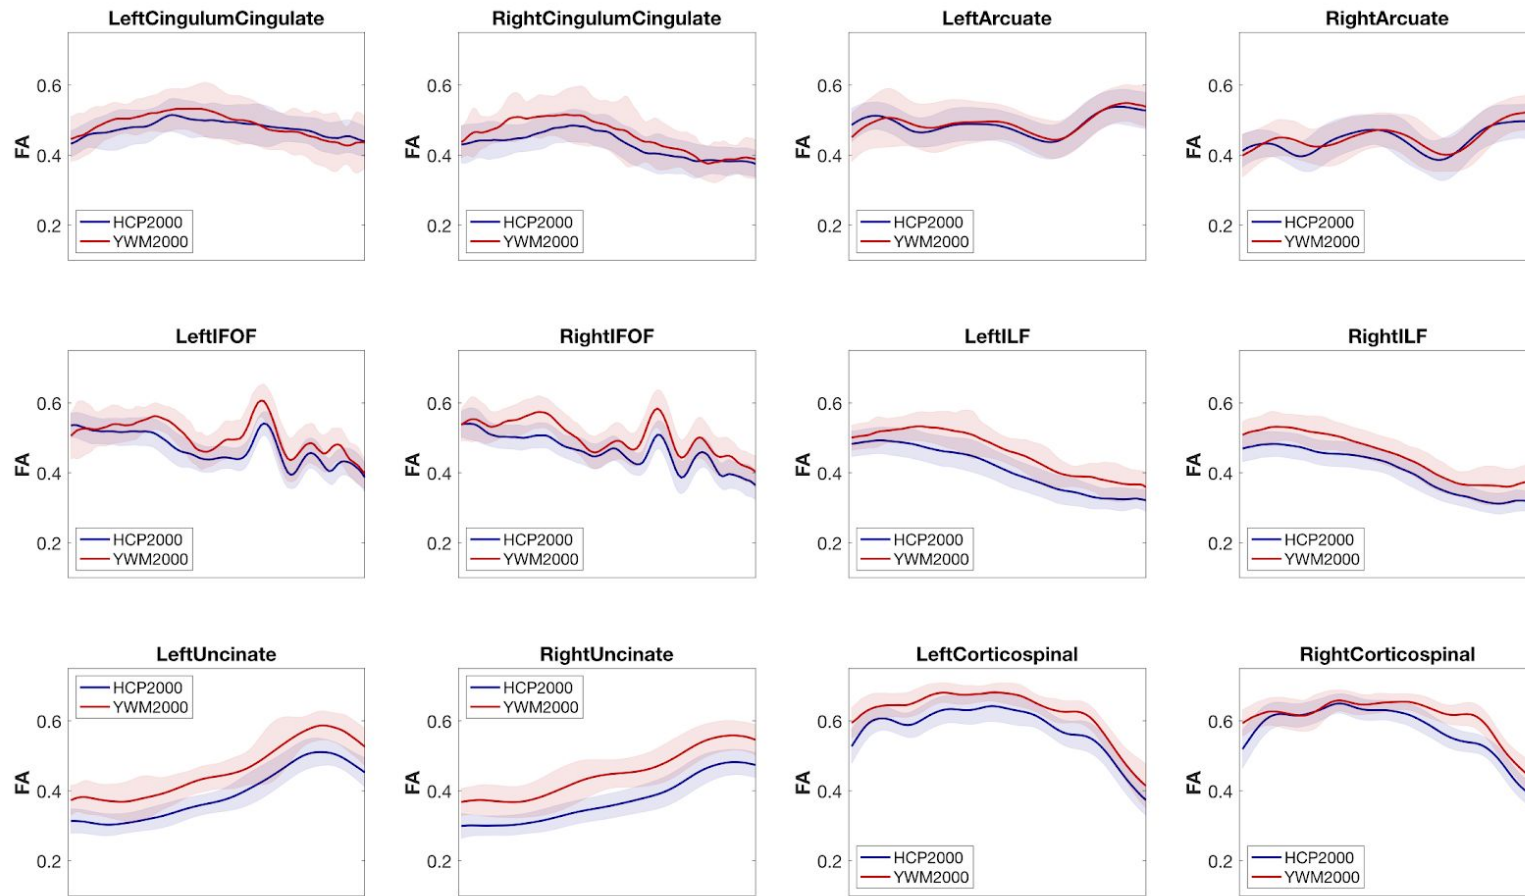

*Figure S1c. Average FA profiles,  $b=2000$  experiments, for six homologous white matter tracts.*

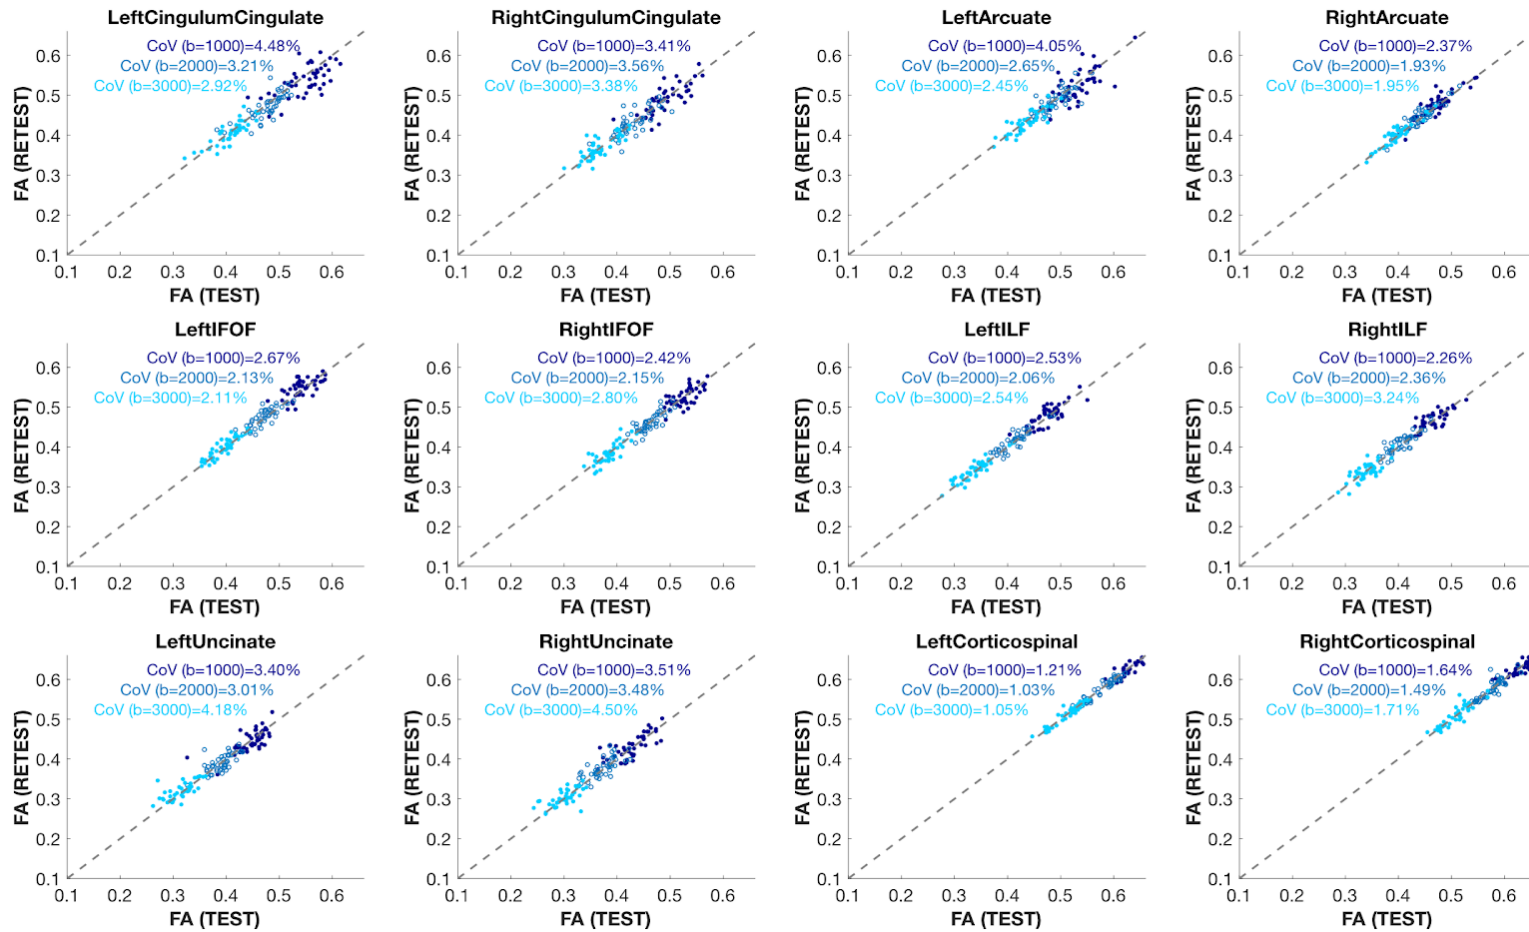

Figure S2. Mean tract FA HCP TEST-RETEST scatterplots. CoV calculated with the within-subject SD method ([Jones and Payne 1997](#); [Synek 2008](#))

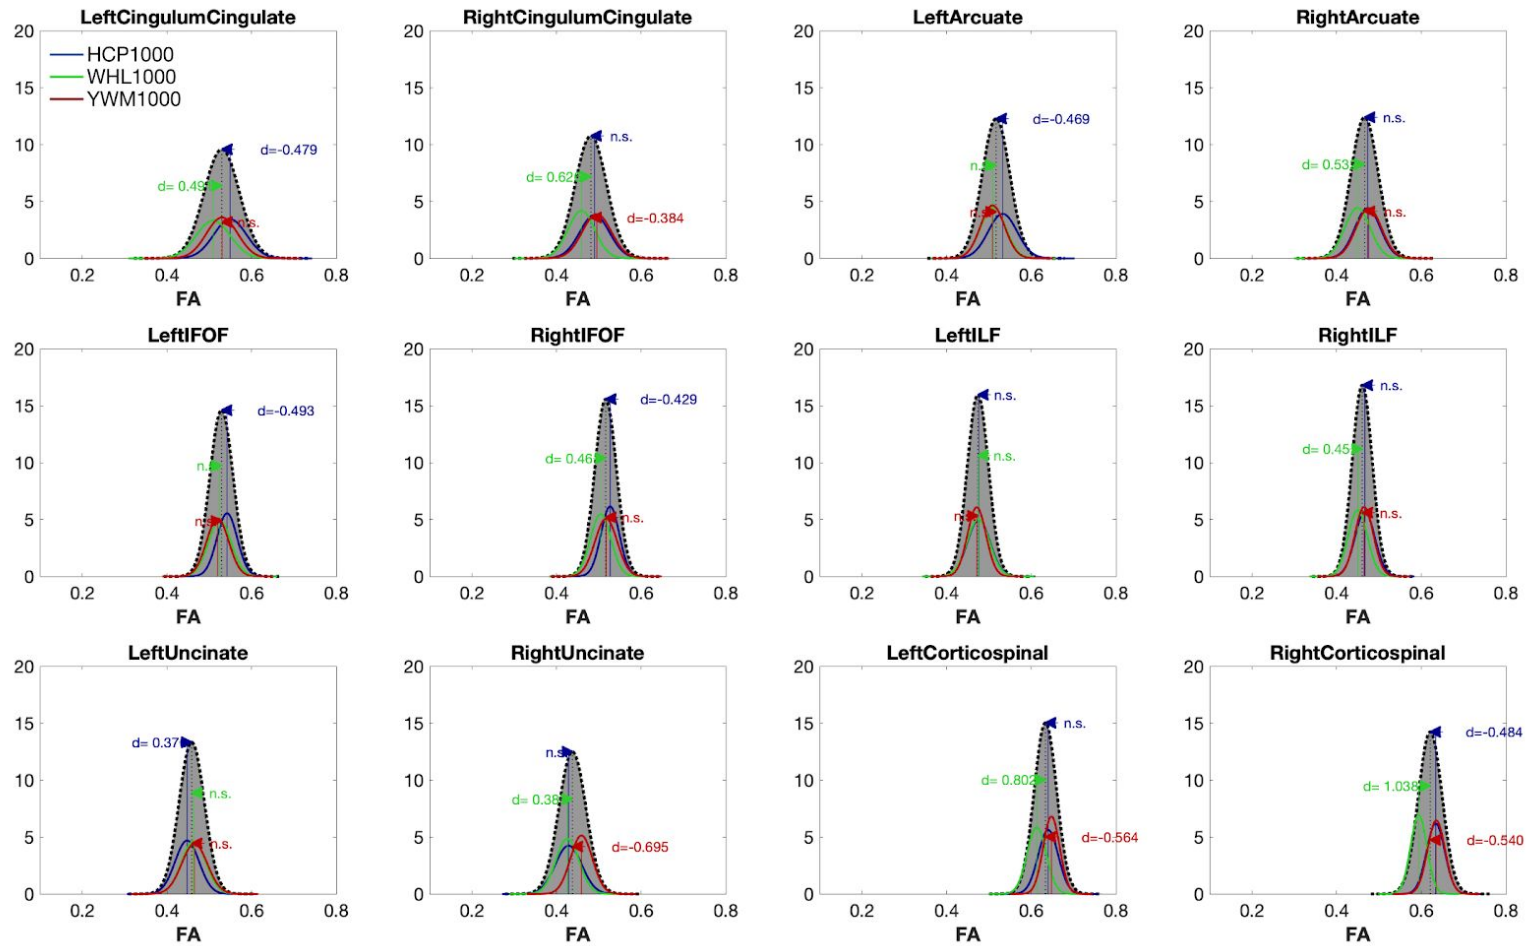

Figure S3a. Normalized probability distributions for the mean FA values, for all tracts and  $b=1000$  experiments.

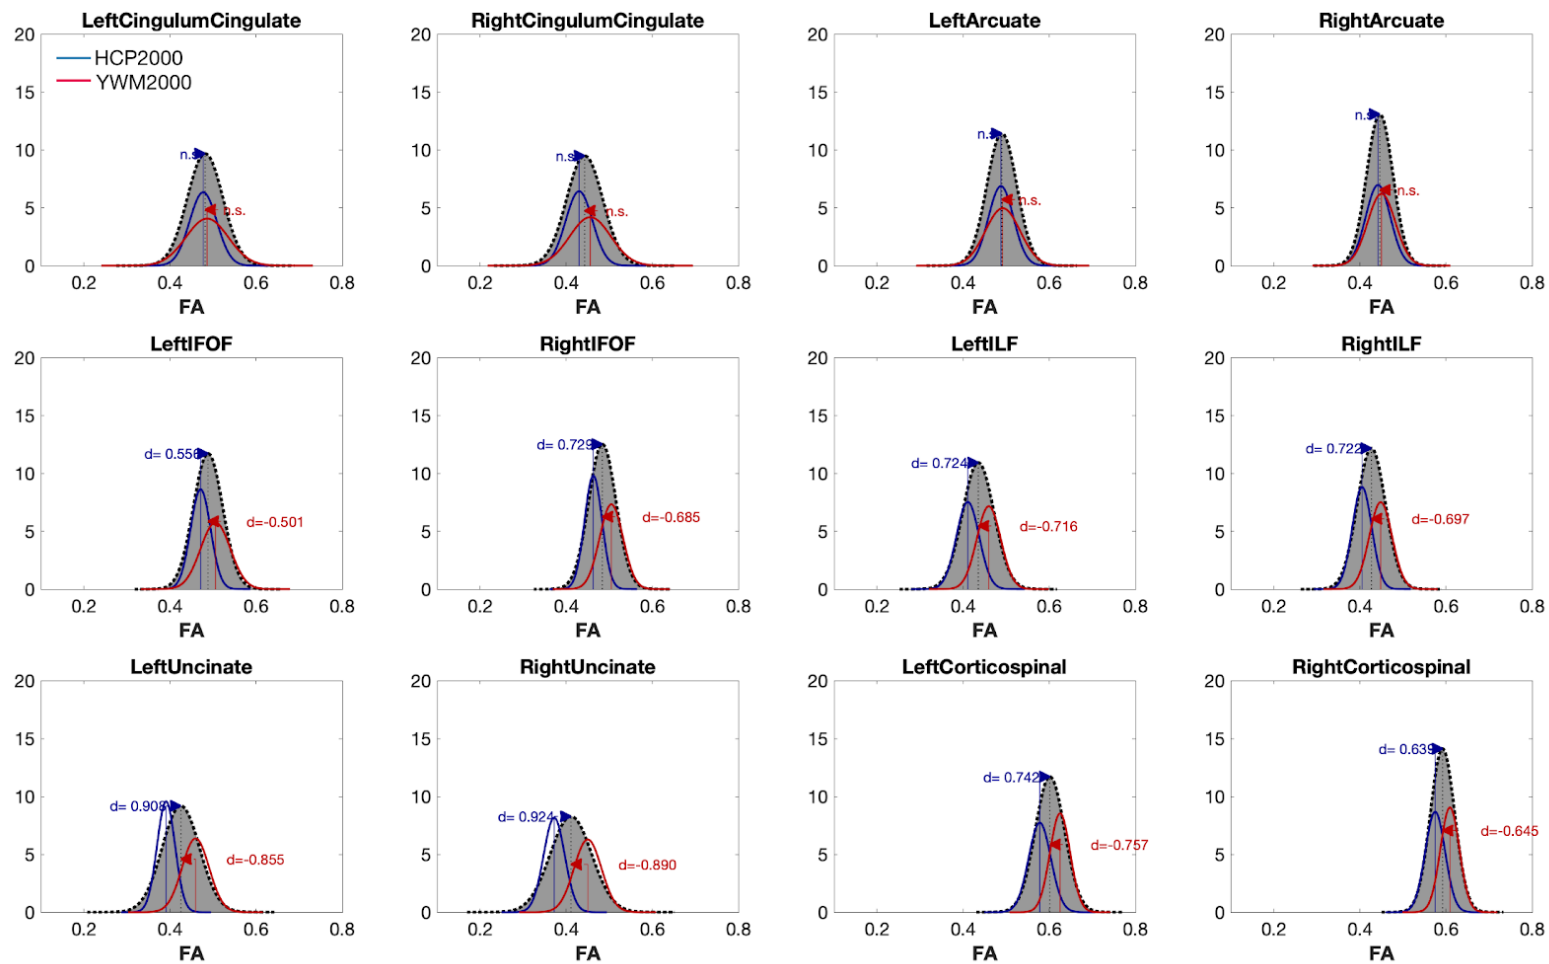

Figure S3b. Normalized probability distributions for the mean FA values, for all tracts and  $b=2000$  experiments.

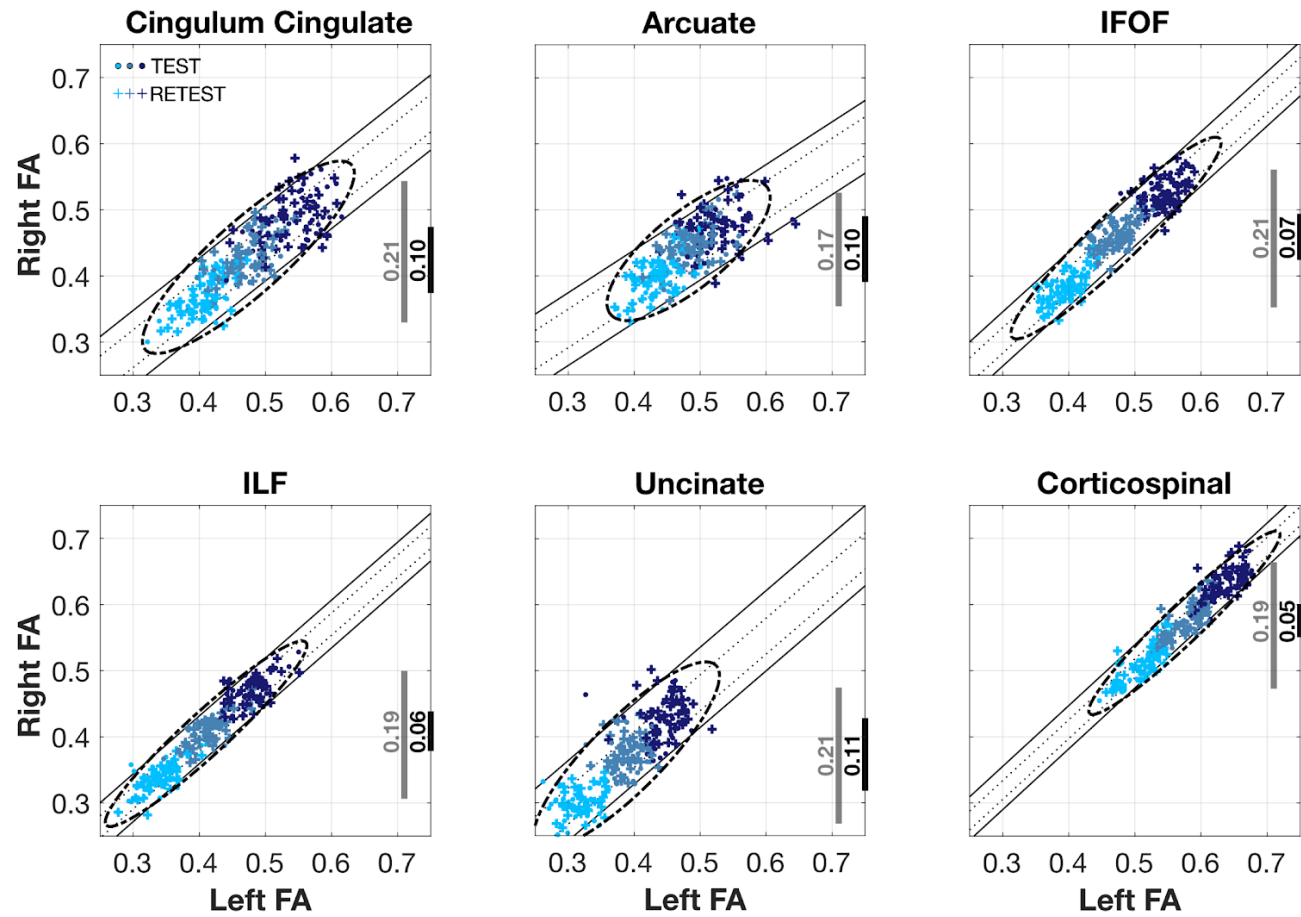

Figure S4. Homologous tract Left-Right FA scatterplots and iso-residual contour lines
